# Supplementary material for: Novel quantitative trait loci for partial resistance to Phytophthora sojae in soybean PI 398841
Source: PubMed Central journal article supplement (PMC3607739; doi:10.1007/s00122-013-2040-x), 2013-01-25

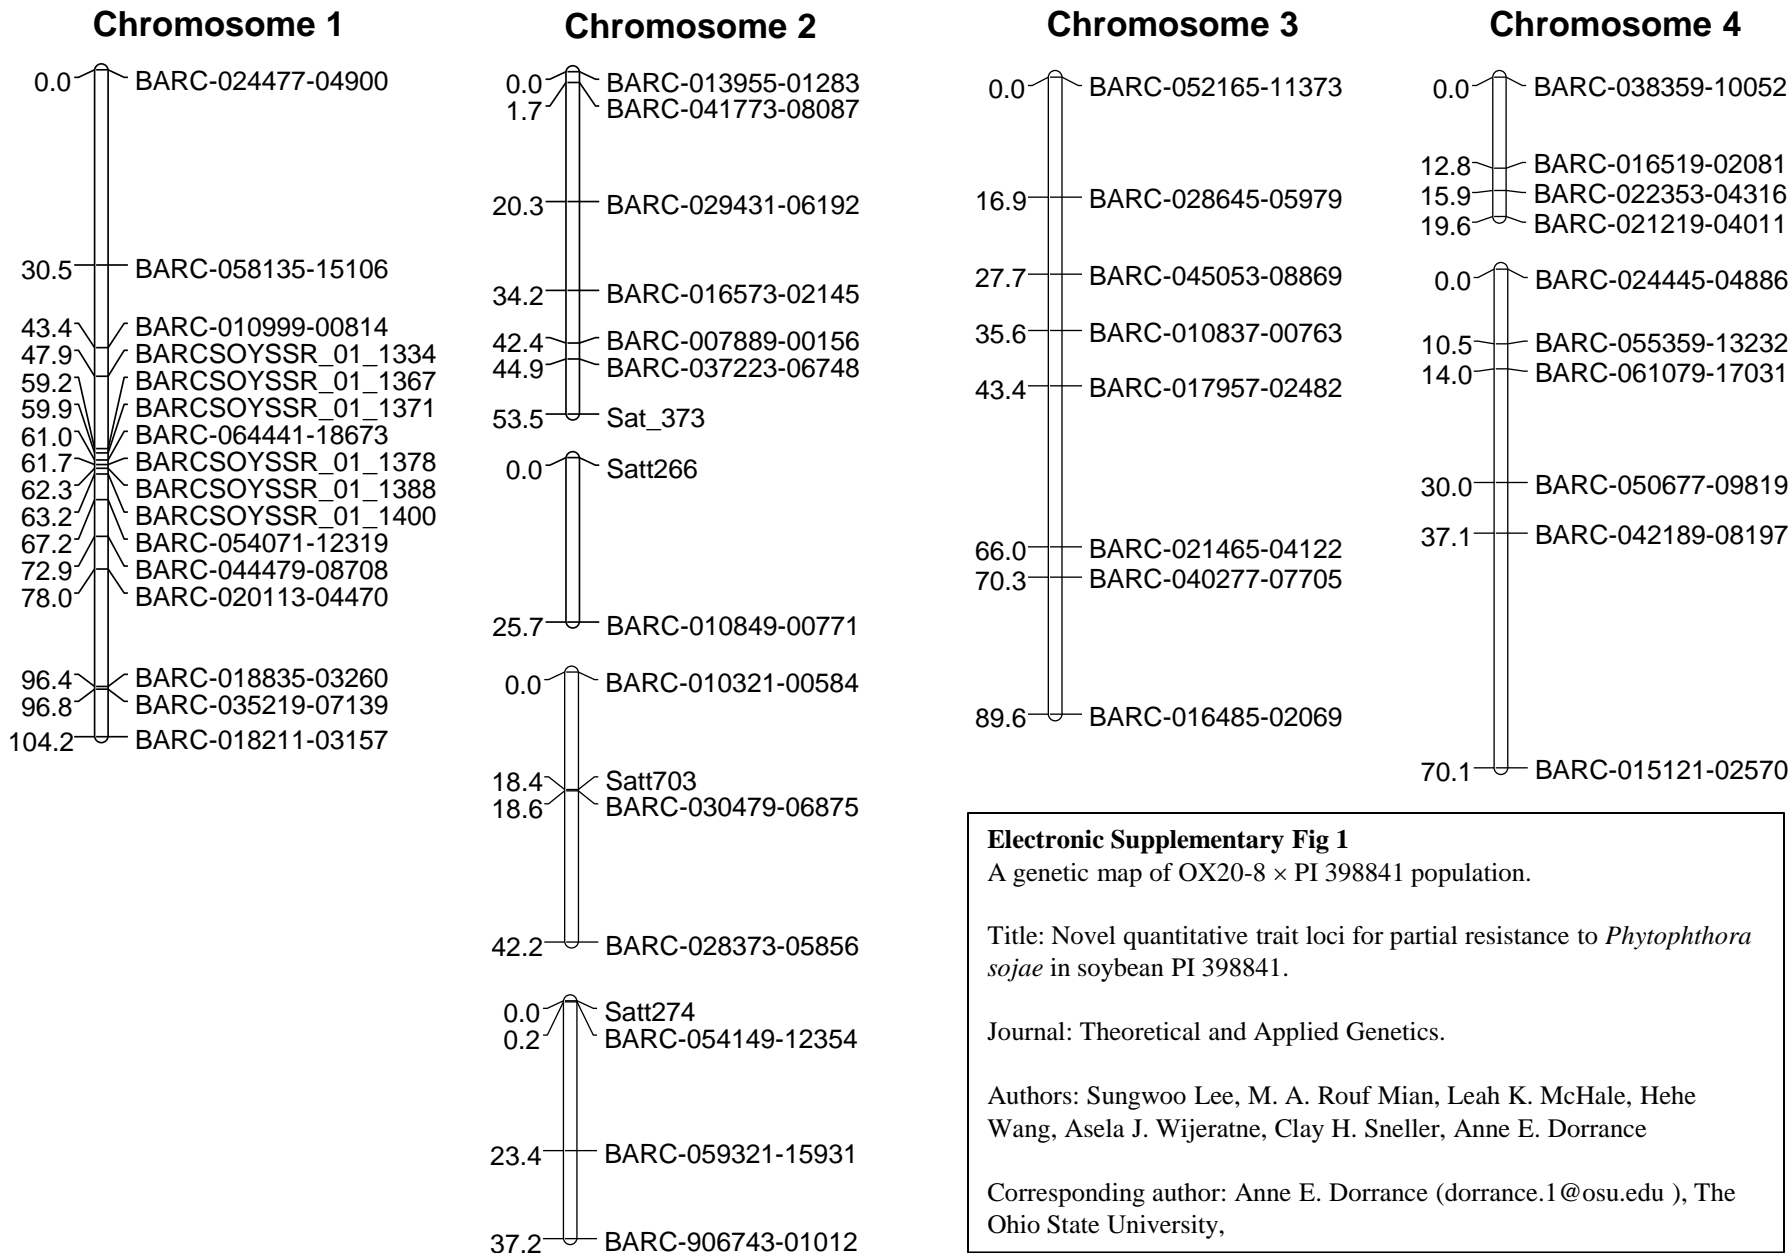

### Chromosome 5

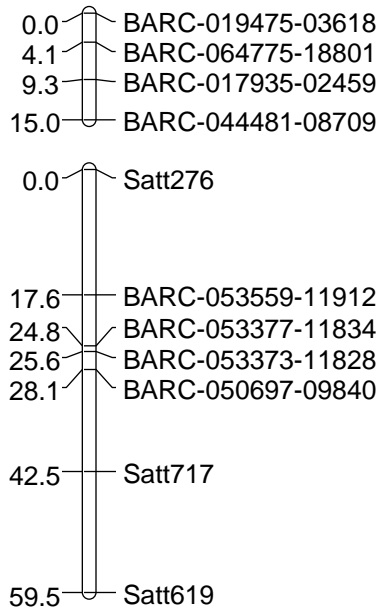

### Chromosome 6

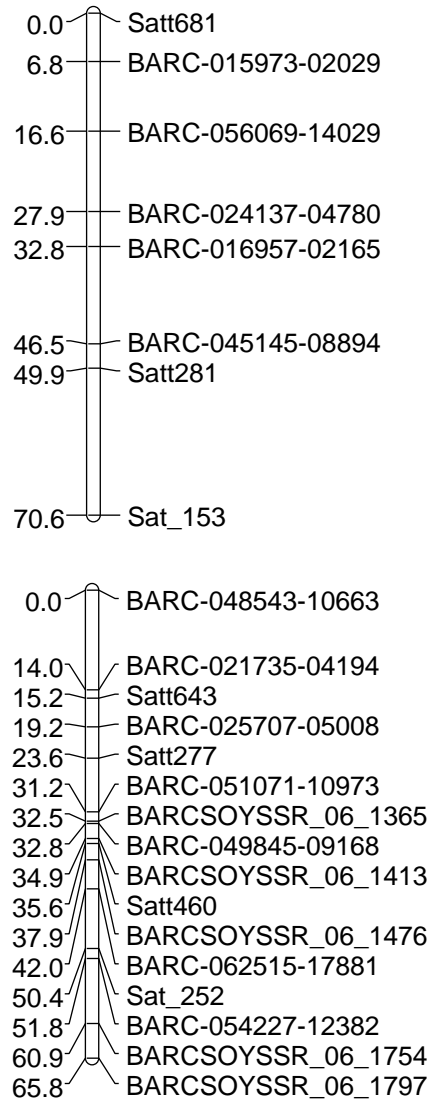

### Chromosome 7

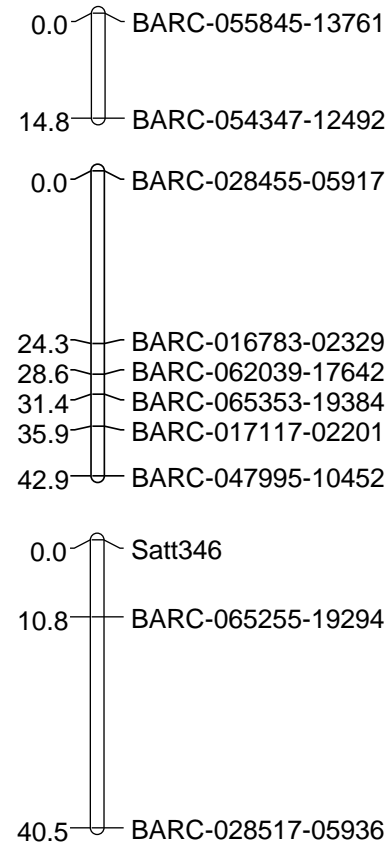

### Chromosome 8

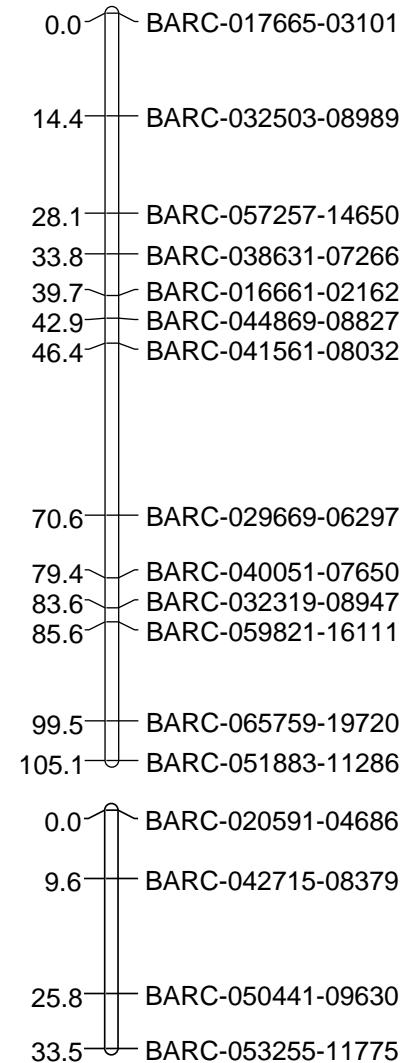

### Chromosome 9

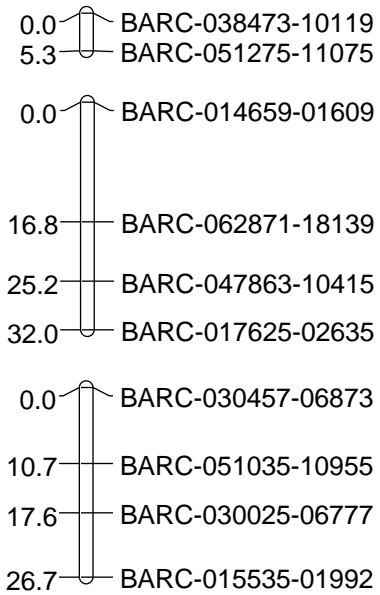

### Chromosome 10

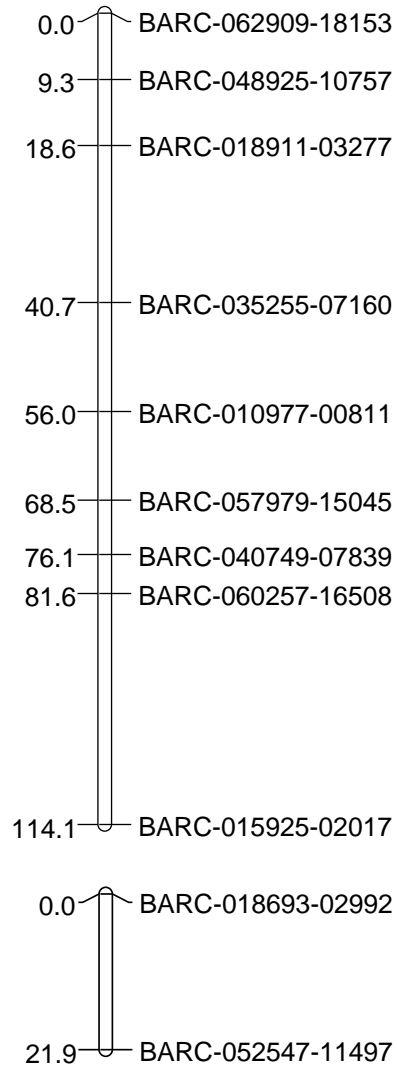

### Chromosome 11

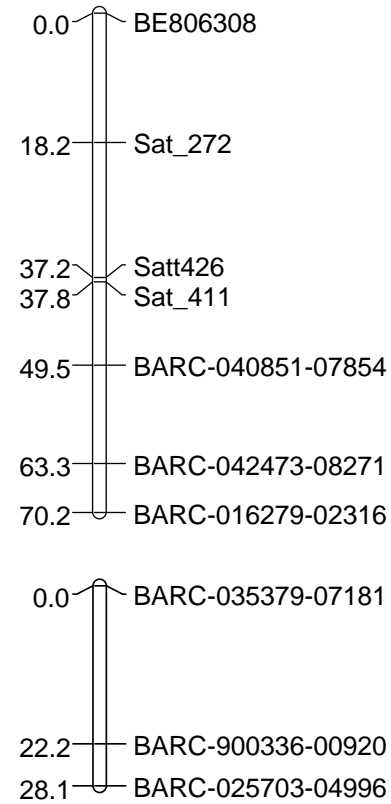

### Chromosome 12

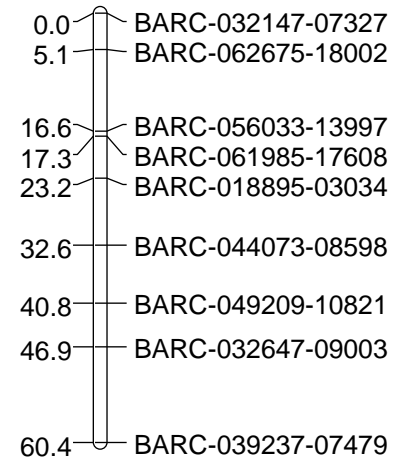

### Chromosome 13

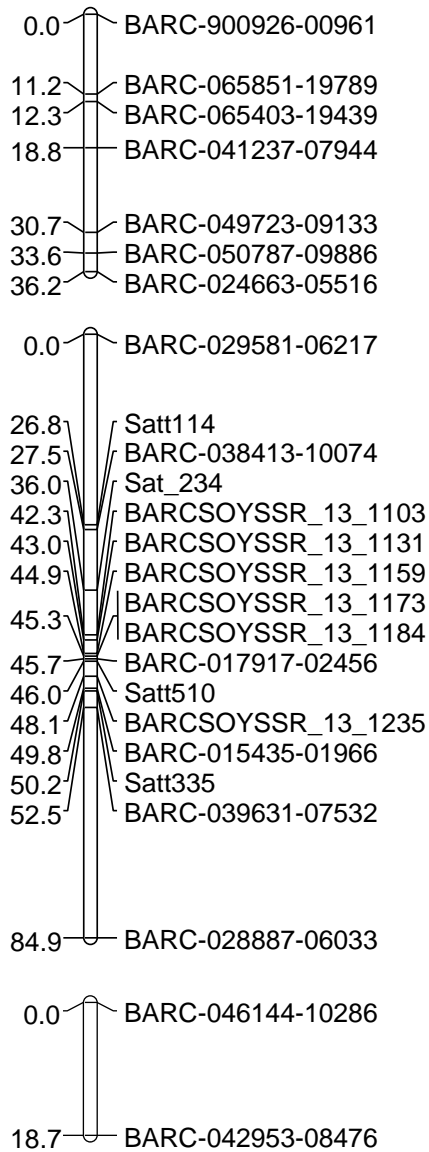

### Chromosome 14

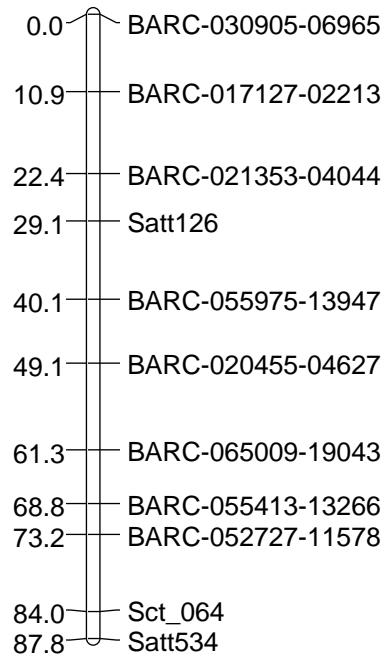

### Chromosome 15

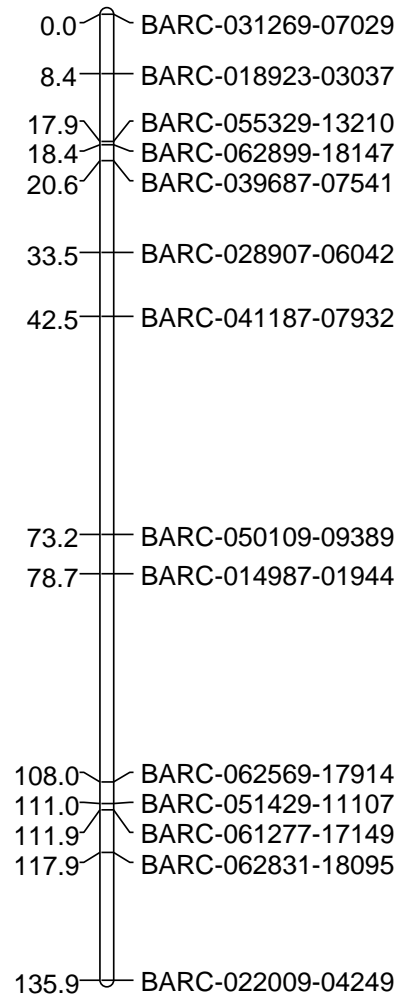

### Chromosome 16

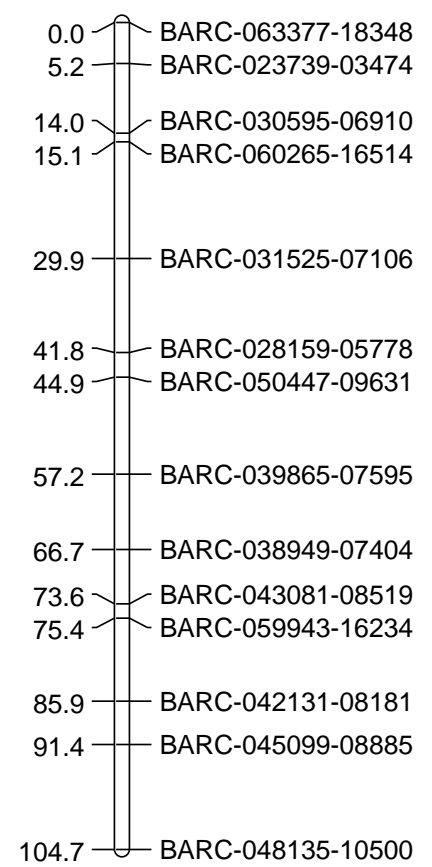

### Chromosome 17

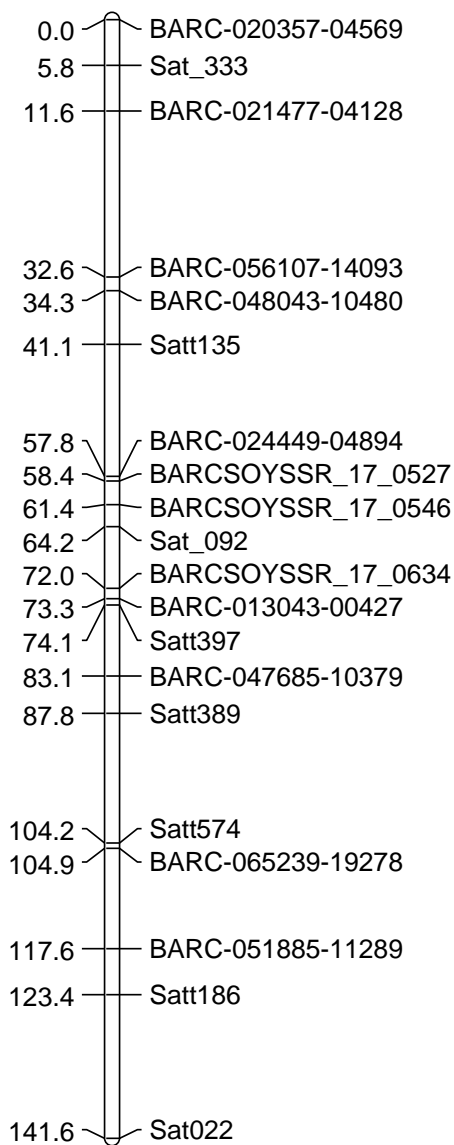

### Chromosome 18

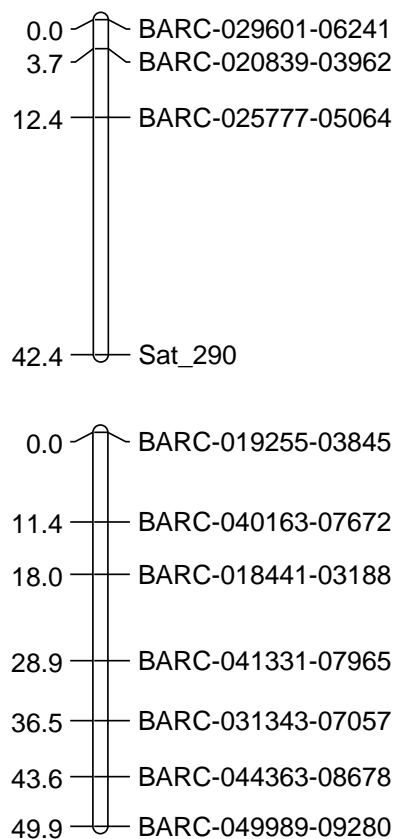

### Chromosome 19

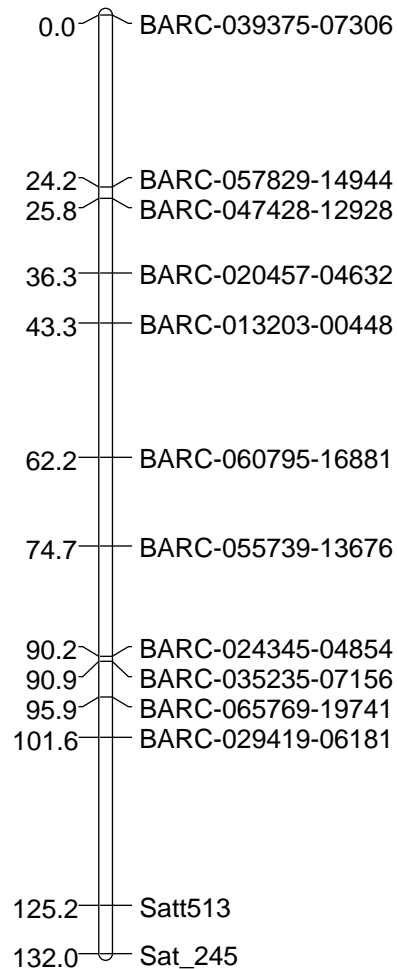

### Chromosome 20

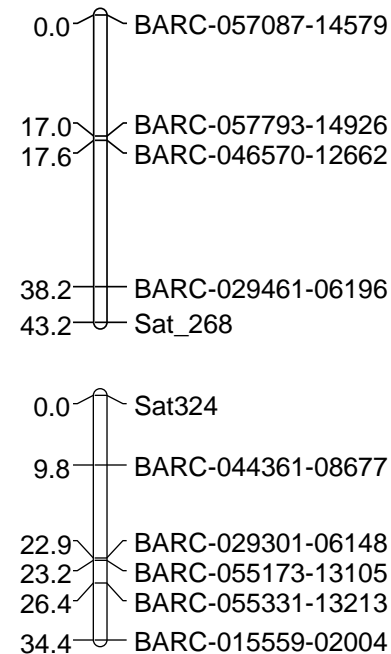

Supplement: 122_2013_2040_MOESM1_ESM.pdf [file 122_2013_2040_MOESM1_ESM.pdf]
